# Supplementary material for: Reporting on invasive lobular breast cancer in clinical trials: a systematic review
Source: PubMed Central journal article supplement (PMC10954721; doi:10.1038/s41523-024-00627-5), 2024-03-20
Supplement: 41523_2024_627_MOESM1_ESM.pdf [file 41523_2024_627_MOESM1_ESM.pdf]

## **Appendix: Reporting on invasive lobular breast cancer in clinical drug trials – a systematic review**

Van Baelen K., Van Cauwenberge J. *et al.*

Overview:

- Supplementary Table 1: PRISMA checklist
- Supplementary Table 2: Search terms clinical drug trials
- Supplementary Table 3: Acquired data per included clinical drug trial

**Supplementary Table 1: PRISMA checklist**

| Section and Topic             | Item # | Checklist item                                                                                                                                                                                                                                                                                       | Location where item is reported |
|-------------------------------|--------|------------------------------------------------------------------------------------------------------------------------------------------------------------------------------------------------------------------------------------------------------------------------------------------------------|---------------------------------|
| <b>TITLE</b>                  |        |                                                                                                                                                                                                                                                                                                      |                                 |
| Title                         | 1      | Identify the report as a systematic review.                                                                                                                                                                                                                                                          | Title                           |
| <b>ABSTRACT</b>               |        |                                                                                                                                                                                                                                                                                                      |                                 |
| Abstract                      | 2      | See the PRISMA 2020 for Abstracts checklist.                                                                                                                                                                                                                                                         | Abstract                        |
| <b>INTRODUCTION</b>           |        |                                                                                                                                                                                                                                                                                                      |                                 |
| Rationale                     | 3      | Describe the rationale for the review in the context of existing knowledge.                                                                                                                                                                                                                          | Introduction                    |
| Objectives                    | 4      | Provide an explicit statement of the objective(s) or question(s) the review addresses.                                                                                                                                                                                                               | Introduction                    |
| <b>METHODS</b>                |        |                                                                                                                                                                                                                                                                                                      |                                 |
| Eligibility criteria          | 5      | Specify the inclusion and exclusion criteria for the review and how studies were grouped for the syntheses.                                                                                                                                                                                          | Methods                         |
| Information sources           | 6      | Specify all databases, registers, websites, organisations, reference lists and other sources searched or consulted to identify studies. Specify the date when each source was last searched or consulted.                                                                                            | Methods                         |
| Search strategy               | 7      | Present the full search strategies for all databases, registers and websites, including any filters and limits used.                                                                                                                                                                                 | Methods and supplementary data  |
| Selection process             | 8      | Specify the methods used to decide whether a study met the inclusion criteria of the review, including how many reviewers screened each record and each report retrieved, whether they worked independently, and if applicable, details of automation tools used in the process.                     | Methods                         |
| Data collection process       | 9      | Specify the methods used to collect data from reports, including how many reviewers collected data from each report, whether they worked independently, any processes for obtaining or confirming data from study investigators, and if applicable, details of automation tools used in the process. | Methods                         |
| Data items                    | 10a    | List and define all outcomes for which data were sought. Specify whether all results that were compatible with each outcome domain in each study were sought (e.g. for all measures, time points, analyses), and if not, the methods used to decide which results to collect.                        | Methods and supplementary data  |
|                               | 10b    | List and define all other variables for which data were sought (e.g. participant and intervention characteristics, funding sources). Describe any assumptions made about any missing or unclear information.                                                                                         | Methods and supplementary data  |
| Study risk of bias assessment | 11     | Specify the methods used to assess risk of bias in the included studies, including details of the tool(s) used, how many reviewers assessed each study and whether they worked independently, and if applicable, details of automation tools used in the process.                                    | NA                              |
| Effect measures               | 12     | Specify for each outcome the effect measure(s) (e.g. risk ratio, mean difference) used in the synthesis or presentation of results.                                                                                                                                                                  | NA                              |
| Synthesis methods             | 13a    | Describe the processes used to decide which studies were eligible for each synthesis (e.g. tabulating the study intervention characteristics and comparing against the planned groups for each synthesis (item #5)).                                                                                 | Methods and supplementary data  |
|                               | 13b    | Describe any methods required to prepare the data for presentation or synthesis, such as handling of missing summary statistics, or data conversions.                                                                                                                                                | NA                              |
|                               | 13c    | Describe any methods used to tabulate or visually display results of individual studies and syntheses.                                                                                                                                                                                               | NA                              |
|                               | 13d    | Describe any methods used to synthesize results and provide a rationale for the choice(s). If meta-analysis was performed, describe the model(s), method(s) to identify the presence and extent of statistical heterogeneity, and software package(s) used.                                          | NA                              |
|                               | 13e    | Describe any methods used to explore possible causes of heterogeneity among study results (e.g. subgroup analysis, meta-regression).                                                                                                                                                                 | NA                              |

| Section and Topic              | Item # | Checklist item                                                                                                                                                                                                                                                                       | Location where item is reported |
|--------------------------------|--------|--------------------------------------------------------------------------------------------------------------------------------------------------------------------------------------------------------------------------------------------------------------------------------------|---------------------------------|
|                                | 13f    | Describe any sensitivity analyses conducted to assess robustness of the synthesized results.                                                                                                                                                                                         | NA                              |
| Reporting bias assessment      | 14     | Describe any methods used to assess risk of bias due to missing results in a synthesis (arising from reporting biases).                                                                                                                                                              | NA                              |
| Certainty assessment           | 15     | Describe any methods used to assess certainty (or confidence) in the body of evidence for an outcome.                                                                                                                                                                                | NA                              |
| <b>RESULTS</b>                 |        |                                                                                                                                                                                                                                                                                      |                                 |
| Study selection                | 16a    | Describe the results of the search and selection process, from the number of records identified in the search to the number of studies included in the review, ideally using a flow diagram.                                                                                         | Figure 1 and results            |
|                                | 16b    | Cite studies that might appear to meet the inclusion criteria, but which were excluded, and explain why they were excluded.                                                                                                                                                          | NA                              |
| Study characteristics          | 17     | Cite each included study and present its characteristics.                                                                                                                                                                                                                            | Supplementary data              |
| Risk of bias in studies        | 18     | Present assessments of risk of bias for each included study.                                                                                                                                                                                                                         | NA                              |
| Results of individual studies  | 19     | For all outcomes, present, for each study: (a) summary statistics for each group (where appropriate) and (b) an effect estimate and its precision (e.g. confidence/credible interval), ideally using structured tables or plots.                                                     | NA                              |
| Results of syntheses           | 20a    | For each synthesis, briefly summarise the characteristics and risk of bias among contributing studies.                                                                                                                                                                               | NA                              |
|                                | 20b    | Present results of all statistical syntheses conducted. If meta-analysis was done, present for each the summary estimate and its precision (e.g. confidence/credible interval) and measures of statistical heterogeneity. If comparing groups, describe the direction of the effect. | NA                              |
|                                | 20c    | Present results of all investigations of possible causes of heterogeneity among study results.                                                                                                                                                                                       | NA                              |
|                                | 20d    | Present results of all sensitivity analyses conducted to assess the robustness of the synthesized results.                                                                                                                                                                           | NA                              |
| Reporting biases               | 21     | Present assessments of risk of bias due to missing results (arising from reporting biases) for each synthesis assessed.                                                                                                                                                              | NA                              |
| Certainty of evidence          | 22     | Present assessments of certainty (or confidence) in the body of evidence for each outcome assessed.                                                                                                                                                                                  | NA                              |
| <b>DISCUSSION</b>              |        |                                                                                                                                                                                                                                                                                      |                                 |
| Discussion                     | 23a    | Provide a general interpretation of the results in the context of other evidence.                                                                                                                                                                                                    | Discussion                      |
|                                | 23b    | Discuss any limitations of the evidence included in the review.                                                                                                                                                                                                                      | Discussion                      |
|                                | 23c    | Discuss any limitations of the review processes used.                                                                                                                                                                                                                                | Discussion                      |
|                                | 23d    | Discuss implications of the results for practice, policy, and future research.                                                                                                                                                                                                       | Discussion                      |
| <b>OTHER INFORMATION</b>       |        |                                                                                                                                                                                                                                                                                      |                                 |
| Registration and protocol      | 24a    | Provide registration information for the review, including register name and registration number, or state that the review was not registered.                                                                                                                                       | Not registered                  |
|                                | 24b    | Indicate where the review protocol can be accessed, or state that a protocol was not prepared.                                                                                                                                                                                       | Not prepared                    |
|                                | 24c    | Describe and explain any amendments to information provided at registration or in the protocol.                                                                                                                                                                                      | NA                              |
| Support                        | 25     | Describe sources of financial or non-financial support for the review, and the role of the funders or sponsors in the review.                                                                                                                                                        | Funding                         |
| Competing interests            | 26     | Declare any competing interests of review authors.                                                                                                                                                                                                                                   | Conflict of interest            |
| Availability of data, code and | 27     | Report which of the following are publicly available and where they can be found: template data collection forms; data extracted from included studies; data used for all analyses; analytic code; any other materials used in the review.                                           | Supplementary data              |

| Section and Topic | Item # | Checklist item | Location where item is reported |
|-------------------|--------|----------------|---------------------------------|
| other materials   |        |                |                                 |

*From:* Page MJ, McKenzie JE, Bossuyt PM, Boutron I, Hoffmann TC, Mulrow CD, et al. The PRISMA 2020 statement: an updated guideline for reporting systematic reviews. *BMJ* 2021;372:n71. doi: 10.1136/bmj.n71

For more information, visit: <http://www.prisma-statement.org/>

**Supplementary Table 2: Search terms clinical drug trials**

| Search terms                                       | Clinicaltrials.gov                                                                                                                                     | Pubmed                                                                                                                                                                                                                                                                                                                                                                                      |
|----------------------------------------------------|--------------------------------------------------------------------------------------------------------------------------------------------------------|---------------------------------------------------------------------------------------------------------------------------------------------------------------------------------------------------------------------------------------------------------------------------------------------------------------------------------------------------------------------------------------------|
| <b>General search terms used</b>                   |                                                                                                                                                        |                                                                                                                                                                                                                                                                                                                                                                                             |
|                                                    | i. Condition or disease: Breast Cancer<br>ii. Study Phase: Phase 3, Phase 4                                                                            | "Breast Neoplasms"[Mesh] AND article type: 'Clinical Trial, phase III' OR 'Clinical Trial, phase IV'                                                                                                                                                                                                                                                                                        |
| <b>Additional search terms used per drug class</b> |                                                                                                                                                        |                                                                                                                                                                                                                                                                                                                                                                                             |
| CDK4/6 inhibitors                                  | Other terms: "CDK4/6 inhibitor" OR "palbociclib" OR "abemaciclib" OR "ribociclib"                                                                      | "palbociclib" [Supplementary Concept] OR "ribociclib" [Supplementary Concept] OR "abemaciclib" [Supplementary Concept]                                                                                                                                                                                                                                                                      |
| Oral SERDs                                         | Other terms: "SERD" OR "selective estrogen receptor degrader" OR "amcenestrant" OR "elacestrant" OR "imlunestrant" OR "camizestrant" OR "giredestrant" | "selective estrogen receptor degrader" [Supplementary Concept] OR "oral selective estrogen receptor degrader" [Supplementary Concept] OR "elacestrant" [Supplementary Concept] OR "amcenestrant" [Supplementary Concept] OR "imlunestrant" [Supplementary Concept] OR "camizestrant" [Supplementary Concept] OR "giredestrant" [Supplementary Concept] OR "AZD9833" [Supplementary Concept] |
| Antibody drug conjugates                           | Other terms: "Antibody-drug conjugates" OR "T-DM1" OR "trastuzumab emtansine" OR "T-DXd" OR "trastuzumab deruxtecan" OR "sacituzumab govitecan"        | "immunoconjugates" [Mesh] OR "sacituzumab govitecan" [Supplementary Concept] OR "trastuzumab deruxtecan" [Supplementary Concept] OR "Ado-trastuzumab Emtansine" [Mesh]                                                                                                                                                                                                                      |
| Immune checkpoint inhibitors                       | Other terms: "Immune Checkpoint inhibitor" OR "pembroluzimab" OR "PDL-1 inhibitor" OR atezolizumab" OR "nivolumab" OR "ipilimumab"                     | "Immune Checkpoint Inhibitors"[Mesh] OR "pembroluzimab" [Supplementary Concept] OR "atezolizumab" [Supplementary Concept] OR "nivolumab"[Mesh] OR "ipilimumab"[Mesh]                                                                                                                                                                                                                        |
| PARP inhibitors                                    | Other terms: "PARP inhibitors" OR "olaparib" OR "niraparib" OR "talazoparib"                                                                           | "Poly(ADP-ribose) Polymerase Inhibitors"[Mesh] OR "olaparib" [Supplementary Concept] OR "talazoparib" [Supplementary Concept] OR "niraparib" [Supplementary Concept] OR "veliparib" [Supplementary Concept] OR "iniparib" [Supplementary Concept]                                                                                                                                           |
| Tyrosine kinase inhibitors                         | Other terms: "Tyrosine Kinase Inhibitors" OR "lapatinib" OR "neratinib" OR "pyrotinib"                                                                 | "Tyrosine Kinase Inhibitors"[Mesh] OR "lapatinib"[Mesh] OR "neratinib" [Supplementary Concept] OR "pyrotinib" [Supplementary Concept]                                                                                                                                                                                                                                                       |
| mTOR inhibitors                                    | Other terms: "mTOR inhibitors" OR "everolimus" OR "temsirolimus" OR "sirolimus"                                                                        | "everolimus"[Mesh] OR "temsirolimus" [Supplementary Concept] OR "sirolimus" [Supplementary Concept]                                                                                                                                                                                                                                                                                         |
| PI3K pathway inhibitors                            | Other terms: "PIK3CA inhibitors" OR "alpelisib" OR "buparlisib" OR "ipatasertib" OR "taselisib" OR "capivasertib"                                      | "alpelisib" [Supplementary Concept] OR "NVP-BKM120" [Supplementary Concept] OR "ipatasertib" [Supplementary Concept] OR "2-(3-(2-(1-isopropyl-3-methyl-1H-1,2,4-triazol-5-yl))-5,6-                                                                                                                                                                                                         |

|        |                                                  |                                                                                                                                                  |
|--------|--------------------------------------------------|--------------------------------------------------------------------------------------------------------------------------------------------------|
|        |                                                  | dihydrobenzo(f)imidazo(1,2-d)(1,4)oxazepin-9-yl)-1H-pyrazol-1-yl)-2-methylpropanamide"<br>[Supplementary Concept] OR<br>"capivasertib"           |
| Others | Other terms:<br>"margetuximab" OR "tucidinostat" | "margetuximab" [Supplementary Concept] OR "N-(2-amino-5-fluorobenzyl)-4-(N-(pyridine-3-acrylyl)aminomethyl)benzamide"<br>[Supplementary Concept] |

SERD: selective estrogen receptor degrader

Supplementary Table 3: Acquired data per included clinical drug trial

| Setting                  | Drug        | Trial                   | Source                       | Company | Enrollment | Treatment arms                                                                   | Primary endpoint | Secondary endpoints                                                                                                                                                                        | Exclusion based on non-measurable disease | Exclusion of ILC | Central pathology for ILC | Is number or % ILC reported | %ILC | Subgroup analyses on ILC performed |
|--------------------------|-------------|-------------------------|------------------------------|---------|------------|----------------------------------------------------------------------------------|------------------|--------------------------------------------------------------------------------------------------------------------------------------------------------------------------------------------|-------------------------------------------|------------------|---------------------------|-----------------------------|------|------------------------------------|
| <b>CDK4/6 inhibitors</b> |             |                         |                              |         |            |                                                                                  |                  |                                                                                                                                                                                            |                                           |                  |                           |                             |      |                                    |
| Neoadjuvant              | Palbociclib | SAFIA <sup>1</sup>      | Clinicaltrials.gov<br>Pubmed | Pfizer  | 354        | *fulvestrant +/- goserelin + palbociclib<br>*fulvestrant +/- goserelin + placebo | pCR              | *Radiological response<br>*Rate of BCS<br>*Safety/<br>Tolerability<br>*DFS<br>*OS                                                                                                          | No                                        | No               | No                        | Yes                         | 12.0 | No                                 |
| Adjuvant                 | Abemaciclib | MONARCHE <sup>2</sup>   | Clinicaltrials.gov<br>Pubmed | Lilly   | 5637       | *endocrine treatment (TPC) + abemaciclib<br>*endocrine treatment (TPC)           | iDFS             | *iDFS in case of<br>Ki67 ≥20%<br>*DRFS<br>*OS<br>*PK<br>*FACT-B, FACIT-F,<br>EQ-5D-5L                                                                                                      | NA                                        | No               | No                        | No                          | NA   | NA                                 |
|                          | Palbociclib | PENELOPE-B <sup>3</sup> | Clinicaltrials.gov<br>Pubmed | Pfizer  | 1250       | *endocrine treatment (TPC) + palbociclib<br>*endocrine treatment (TPC) + placebo | iDFS             | *iDFS excluding<br>second non-<br>breast cancers<br>*DDFS<br>*OS<br>*iDFS in luminal B<br>*Compliance/<br>Safety<br>*Patient reported<br>outcomes, QALY<br>*AUC<br>*Correlation<br>between | NA                                        | No               | No                        | No                          | NA   | NA                                 |

|            |             |                           |                              |        |      |                                                                                            |      |                                                                                                                                 |                                                  |    |    |     |      |    |
|------------|-------------|---------------------------|------------------------------|--------|------|--------------------------------------------------------------------------------------------|------|---------------------------------------------------------------------------------------------------------------------------------|--------------------------------------------------|----|----|-----|------|----|
|            | Palbociclib | PALLAS <sup>4</sup>       | Clinicaltrials.gov<br>Pubmed | Pfizer | 5796 | *endocrine treatment (TPC) + palbociclib<br>*endocrine treatment (TPC)                     | iDFS | exposure/efficacy<br>and/or safety<br>*iDFS excluding<br>second non-<br>breast cancers<br>*DRFS<br>*OS<br>*LRRFS                | NA                                               | No | No | No  | NA   | NA |
| Metastatic | Abemaciclib | MONARCH2 <sup>5</sup>     | Clinicaltrials.gov<br>Pubmed | Lilly  | 669  | *fulvestrant + abemaciclib<br>*fulvestrant + placebo                                       | PFS  | *OS<br>*ORR<br>*DOR<br>*DCR<br>*CBR<br>*mBPI-sf<br>*PK<br>*EQ-5D-5L, EORTC<br>QLQ-C30, EORTC<br>QLQ-BR23                        | Yes<br>(exception<br>of bone<br>only<br>disease) | No | No | No  | NA   | NA |
|            | Abemaciclib | MONARCH3 <sup>6</sup>     | Clinicaltrials.gov<br>Pubmed | Lilly  | 493  | *AI + abemaciclib<br>*AI + placebo                                                         | PFS  | *OS<br>*ORR<br>*DOR<br>*DCR<br>*CBR<br>*ES-5D-5L, EORTC<br>QLQ-C30; EORTC<br>QLQ-BR23<br>*PK                                    | Yes<br>(exception<br>of bone<br>only<br>disease) | No | No | No  | NA   | NA |
|            | Abemaciclib | MONARCH Plus <sup>7</sup> | Clinicaltrials.gov<br>Pubmed | Lilly  | 463  | *AI + abemaciclib<br>*AI + placebo<br>*fulvestrant + abemaciclib<br>*fulvestrant + placebo | PFS  | *OS<br>*ORR<br>*DOR<br>*DCR<br>*CBR<br>*EORTC QLQ-C30<br>*PK                                                                    | Yes<br>(exception<br>of bone<br>only<br>disease) | No | No | No  | NA   | NA |
|            | Palbociclib | PALOMA2 <sup>8</sup>      | Clinicaltrials.gov<br>Pubmed | Pfizer | 666  | *letrozole + palbociclib<br>*letrozole + placebo                                           | PFS  | *ORR<br>*DOR<br>*CBR<br>*PFS by<br>biomarkers<br>*QTc<br>*Ctrough<br>*EQ-5D, FACT-B<br>*TEAE<br>*OS<br>*Survival<br>probability | Yes<br>(exception<br>of bone<br>only<br>disease) | No | No | Yes | 14.7 | No |



|             |                          |                              |          |      |                                                        |               |                                                                                                                                                              |                                                  |    |    |     |     |    |  |
|-------------|--------------------------|------------------------------|----------|------|--------------------------------------------------------|---------------|--------------------------------------------------------------------------------------------------------------------------------------------------------------|--------------------------------------------------|----|----|-----|-----|----|--|
|             |                          |                              |          |      |                                                        |               |                                                                                                                                                              | °CTCAE                                           |    |    |     |     |    |  |
| Palbociclib | PALOMA3 <sup>9</sup>     | Clinicaltrials.gov<br>Pubmed | Pfizer   | 521  | °fulvestrant + palbociclib<br>°fulvestrant + placebo   | PFS           | °OS<br>°ORR<br>°DOR<br>°CBR<br>°Survival probabilities<br>°Ctough<br>°EORTC QLQ-C30,<br>EORTC QLQ-BR23,<br>EQ-5D<br>°TTD<br>°TEAE                            | Yes<br>(exception<br>of bone<br>only<br>disease) | No | No | No  | NA  | NA |  |
| Palbociclib | PALOMA4 <sup>10</sup>    | Clinicaltrials.gov<br>Pubmed | Pfizer   | 340  | °letrozole + palbociclib<br>°letrozole + placebo       | PFS           | °ORR<br>°DOR<br>°CBR<br>°OS<br>°Survival<br>Probability<br>°TEAE<br>°CTCAE<br>°Ctough<br>°EQ-5D, FACT-B<br>°% positive cells<br>for Ki67<br>°Detection in ER | Yes<br>(exception<br>of bone<br>only<br>disease) | No | No | Yes | 3.8 | No |  |
| Palbociclib | PADA-1 <sup>11</sup>     | Clinicaltrials.gov<br>Pubmed | Pfizer   | 1017 | °AI + palbociclib<br>°fulvestrant + palbociclib        | °TEAE<br>°PFS | °Time to strategy<br>failure<br>°Chemotherapy-<br>free survival<br>°EORTC QLQ-C30<br>°Other line of<br>therapy<br>°OS                                        | Yes<br>(exception<br>of bone<br>only<br>disease) | No | No | No  | NA  | NA |  |
| Palbociclib | PEARL <sup>12</sup>      | Clinicaltrials.gov<br>Pubmed | Pfizer   | 693  | °fulvestrant/exemestane + palbociclib<br>°capecitabine | PFS           | °ORR<br>°CBR<br>°DOR<br>°OS<br>°TEAE                                                                                                                         | Yes<br>(exception<br>of bone<br>only<br>disease) | No | No | No  | NA  | NA |  |
| Ribociclib  | MONALEESA2 <sup>13</sup> | Clinicaltrials.gov<br>Pubmed | Novartis | 668  | °letrozole + ribociclib<br>°letrozole + placebo        | PFS           | °ORR<br>°OS<br>°CBR<br>°Time to<br>deterioration<br>ECOG                                                                                                     | Yes<br>(exception<br>of bone<br>only<br>disease) | No | No | No  | NA  | NA |  |

|            |                           |                              |          |      |                                                                                                                                                                                                  |               |                                                                                                                       |                                                                          |    |    |    |    |    |  |  |
|------------|---------------------------|------------------------------|----------|------|--------------------------------------------------------------------------------------------------------------------------------------------------------------------------------------------------|---------------|-----------------------------------------------------------------------------------------------------------------------|--------------------------------------------------------------------------|----|----|----|----|----|--|--|
|            |                           |                              |          |      |                                                                                                                                                                                                  |               |                                                                                                                       | performance status<br>°Safety and Tolerability<br>°EORTC QLQ-C30<br>°QTc |    |    |    |    |    |  |  |
| Ribociclib | MONALEESA3 <sup>14</sup>  | Clinicaltrials.gov<br>Pubmed | Novartis | 726  | *fulvestrant + ribociclib<br>*fulvestrant + placebo                                                                                                                                              | PFS           | *OS<br>*ORR<br>*TTD<br>*ECOG performance status<br>*Safety and Tolerability<br>°EORTC QLQ-C30<br>*CBR<br>*TTR<br>°DOR | Yes (exception of bone only disease)                                     | No | No | No | NA | NA |  |  |
| Ribociclib | MONALEESA7 <sup>15</sup>  | Clinicaltrials.gov<br>Pubmed | Novartis | 672  | *AI/tamoxifen + goserelin + ribociclib<br>*AI/tamoxifen + goserelin + placebo                                                                                                                    | PFS           | *OS<br>*ORR<br>*CBR<br>*Safety and Tolerability<br>*TTR<br>°DOR<br>°TTD<br>°ECOG performance status<br>°EORTC QLQ-C30 | Yes (exception of bone only disease)                                     | No | No | No | NA | NA |  |  |
| Ribociclib | RIBECCA <sup>16</sup>     | Clinicaltrials.gov<br>Pubmed | Novartis | 502  | *letrozole + ribociclib in postmenopausal women or in men<br>*letrozole + goserelin + ribociclib in pre/perimenopausal women<br>*letrozole +/- goserelin + ribociclib in pretreated women or men | CBR           | *PFS<br>°OS<br>*ORR<br>°EORTC QLQ-C30, EORTC QLQ-BR23<br>°TTD<br>°EORTC Global Health Status<br>°TEAE                 | No                                                                       | No | No | No | NA | NA |  |  |
| Ribociclib | COMPLEMENT1 <sup>17</sup> | Clinicaltrials.gov<br>Pubmed | Novartis | 3246 | *letrozole +/- goserelin/leuprolide + ribociclib                                                                                                                                                 | *TEAE<br>°SEA | *TTP<br>°ORR<br>*CBR<br>°FACT-B                                                                                       | No                                                                       | No | No | No | NA | NA |  |  |

|                                 |             |                           |                              |                       |     |                                                     |                                      |                                                                                                                                                                                                                                    |                                      |    |    |    |    |    |
|---------------------------------|-------------|---------------------------|------------------------------|-----------------------|-----|-----------------------------------------------------|--------------------------------------|------------------------------------------------------------------------------------------------------------------------------------------------------------------------------------------------------------------------------------|--------------------------------------|----|----|----|----|----|
|                                 | Ribociclib  | BioltaLEE <sup>18</sup>   | Clinicaltrials.gov<br>Pubmed | Novartis              | 287 | *ribociclib + letrozole<br>*alpelisib + fulvestrant | % of patients with ctDNA alterations | *Change in TK1 concentrations<br>*Change in TMB<br>*% of patients with mutations<br>*% of patients with alterations in liquid biopsy vs. tissue biopsy<br>*Micro-environment parameters<br>*TTP<br>*adverse events<br>*ORR<br>*CBR | No                                   | No | No | No | NA | NA |
| <b>Oral SERDs</b>               |             |                           |                              |                       |     |                                                     |                                      |                                                                                                                                                                                                                                    |                                      |    |    |    |    |    |
| Metastatic                      | Elacestrant | EMERALD III <sup>19</sup> | Clinicaltrials.gov<br>Pubmed | Stemline therapeutics | 477 | *SOC (AI /fulvestrant)<br>*elacestrant              | PFS                                  | *OS<br>*BICR-assessed PFS and OS<br>*PFS assessed by the investigator<br>*ORR<br>*DOR<br>*CBR<br>*Safety and Tolerability                                                                                                          | Yes (exception of bone only disease) | No | No | No | NA | NA |
| <b>Antibody drug conjugates</b> |             |                           |                              |                       |     |                                                     |                                      |                                                                                                                                                                                                                                    |                                      |    |    |    |    |    |
| Neoadjuvant                     | T-DM1       | KRISTINE <sup>20</sup>    | Clinicaltrials.gov<br>Pubmed | Roche                 | 444 | *trastuzumab + pertuzumab<br>*T-DM1 + pertuzumab    | pCR                                  | *OS<br>*Rate of BCS<br>*EFS<br>*iDFS<br>*EORTC QLQ-C30, EORTC QLQ-BR23 modified<br>*Cmax<br>*Cmin<br>*Plasma DM1 concentrations, Serum DM1 catabolites concentrations<br>*TEAE<br>*ATA                                             | No                                   | No | No | No | NA | NA |

|            |       |                         |                              |       |      |                                                                                            |                                                                                                          |                                                                                                                                                                                                                                                |    |    |    |    |    |    |
|------------|-------|-------------------------|------------------------------|-------|------|--------------------------------------------------------------------------------------------|----------------------------------------------------------------------------------------------------------|------------------------------------------------------------------------------------------------------------------------------------------------------------------------------------------------------------------------------------------------|----|----|----|----|----|----|
| Adjuvant   | T-DM1 | KAITLIN <sup>21</sup>   | Clinicaltrials.gov<br>Pubmed | Roche | 1846 | *AC followed by trastuzumab +<br>pertuzumab + taxane<br>*AC followed by T-DM1 + pertuzumab | iDFS                                                                                                     | *IDFS + Second<br>Primary Non-<br>Breast Cancer<br>*DFS<br>*DRFI<br>*OS<br>*TEAE<br>*% with decrease<br>LVEF<br>*EORTC QLQ-C30,<br>EORTC QLQ-BR23                                                                                              | NA | No | No | No | NA | NA |
|            | T-DM1 | KATHERINE <sup>22</sup> | Clinicaltrials.gov<br>Pubmed | Roche | 1487 | *trastuzumab<br>*T-DM1                                                                     | iDFS                                                                                                     | *IDFS + Second<br>Primary Non-<br>Breast Cancer<br>*DFS<br>*OS<br>*DRFI<br>*TEAE<br>*Cardiac<br>dysfunction<br>*EORTC QLQ-C30,<br>EORTC QLQ-BR23<br>*Serum<br>concentrations,<br>plasma<br>concentrations of<br>DM1<br>*T-DM1 Exposure<br>*ATA | NA | No | No | No | NA | NA |
| Metastatic | T-DM1 | EMILIA <sup>23</sup>    | ClinicalTrials.gov<br>Pubmed | Roche | 991  | *T-DM1<br>*lapatinib + capecitabine                                                        | *% with PD<br>by IRC<br>*PFS by IRC<br>*% death<br>*OS<br>*% alive at<br>year 1, %<br>alive at<br>year 2 | *% with PD by<br>Investigator<br>*PFS by<br>Investigator<br>*ORR<br>*DOR<br>*CBR<br>*% Treatment<br>Failure<br>*% Symptom<br>progression<br>*Time to<br>Symptom<br>progression                                                                 | No | No | No | No | NA | NA |
|            | T-DM1 | TH3RESA <sup>24</sup>   | ClinicalTrials.gov<br>Pubmed | Roche | 602  | *T-DM1<br>*TPC                                                                             | *PFS<br>*OS                                                                                              | *ORR<br>*DOR                                                                                                                                                                                                                                   | No | No | No | No | NA | NA |

|       |                        |                              |       |      |                                                                             |                                       |                                                                                                                                                                                                                                                                                                                                                                                                          |                                        |    |    |    |    |    |  |  |
|-------|------------------------|------------------------------|-------|------|-----------------------------------------------------------------------------|---------------------------------------|----------------------------------------------------------------------------------------------------------------------------------------------------------------------------------------------------------------------------------------------------------------------------------------------------------------------------------------------------------------------------------------------------------|----------------------------------------|----|----|----|----|----|--|--|
|       |                        |                              |       |      |                                                                             |                                       |                                                                                                                                                                                                                                                                                                                                                                                                          | °6m and 1y Survival<br>°EORTC QLQ-BM22 |    |    |    |    |    |  |  |
| T-DM1 | KAMILLA <sup>25</sup>  | ClinicalTrials.gov<br>Pubmed | Roche | 2185 | °T-DM1 all participants<br>°T-DM1 Asian participants                        | AEPI                                  | °AESI<br>°PFS<br>°OS<br>°ORR<br>°CBR<br>°DOR<br>°TTR<br>°Number and Type of Hospitals Visits                                                                                                                                                                                                                                                                                                             | No                                     | No | No | No | NA | NA |  |  |
| T-DM1 | MARIANNE <sup>26</sup> | ClinicalTrials.gov<br>Pubmed | Roche | 1095 | °trastuzumab + taxane<br>°T-DM1 + pertuzumab<br>°T-DM1 + pertuzumab placebo | °% Death and PD by IRC<br>°PFS by IRC | °% Death prior to clinical cut off<br>°OS<br>°% Death and PD by Investigator<br>°PFS by Investigator<br>°% with Treatment Failure<br>°TTF<br>°1y Survival<br>°Grade 3 TEAE<br>°% Death at 2y<br>°OS 2y<br>°CTCAE<br>°ECOG<br>Performance status<br>°Hospitalization days<br>°% Hospitalizations<br>°ORR<br>°CBR<br>°FACT-TaxS<br>°FACT-C, HRQOL, FACT-B, RSCL, WPAI<br>°Outcomes in Low HER2 mRNA levels | No                                     | No | No | No | NA | NA |  |  |
| T-DM1 | ELAINA <sup>27</sup>   | Clinicaltrials.gov           | Roche | 200  | °T-DM1<br>°lapatinib + capecitabine                                         | PFS                                   | °ORR<br>°DOR                                                                                                                                                                                                                                                                                                                                                                                             | No                                     | No | No | No | NA | NA |  |  |

|                       |                                |                              |                 |     |                                                                                   |             |                                                                                                                         |                                                                                                                    |    |    |    |    |    |  |  |
|-----------------------|--------------------------------|------------------------------|-----------------|-----|-----------------------------------------------------------------------------------|-------------|-------------------------------------------------------------------------------------------------------------------------|--------------------------------------------------------------------------------------------------------------------|----|----|----|----|----|--|--|
|                       |                                |                              |                 |     |                                                                                   |             |                                                                                                                         | °OS<br>°Adverse events<br>°Concentration T-DM1<br>°Concentration DM1<br>°Concentration trastuzumab<br>°ATA<br>°PRO |    |    |    |    |    |  |  |
| T-DXd                 | DESTINY-Breast02 <sup>28</sup> | ClinicalTrials.gov<br>Pubmed | AstraZeneca     | 608 | °T-DXd<br>°trastuzumab + capecitabine<br>°lapatinib + capecitabine                | PFS by BICR | °OS<br>°ORR<br>°DOR<br>°PFS by Investigator                                                                             | No                                                                                                                 | No | No | No | NA | NA |  |  |
| T-DXd                 | DESTINY-Breast03 <sup>29</sup> | ClinicalTrials.gov<br>Pubmed | AstraZeneca     | 524 | °T-DXd<br>°T-DM1                                                                  | PFS by BICR | °OS<br>°ORR<br>°DOR<br>°PFS by Investigator                                                                             | No                                                                                                                 | No | No | No | NA | NA |  |  |
| T-DXd                 | DESTINY-Breast04 <sup>30</sup> | ClinicalTrials.gov<br>Pubmed | AstraZeneca     | 557 | °T-DXd<br>°TPC (capecitabine, eribulin, gemcitabine, paclitaxel, nab-paclitaxel)  | PFS by BICR | °PFS by Investigator<br>°OS<br>°ORR<br>°DOR                                                                             | Yes                                                                                                                | No | No | No | NA | NA |  |  |
| Sacituzumab-Govitecan | TROPICS02 <sup>31</sup>        | ClinicalTrials.gov<br>Pubmed | Gilead Sciences | 543 | °sacituzumab-govitecan<br>°TPC (capecitabine, eribulin, gemcitabine, vinorelbine) | PFS         | °ORR<br>°OS<br>°DOR<br>°CBR<br>°EORTC QLQ-C30<br>°TEAE<br>°SAE<br>°Laboratory Abnormalities<br>°ECOG Performance status | No                                                                                                                 | No | No | No | NA | NA |  |  |
| Sacituzumab-Govitecan | ASCENT <sup>32</sup>           | ClinicalTrials.gov<br>Pubmed | Gilead Sciences | 529 | °sacituzumab-govitecan<br>°TPC (capecitabine, eribulin, gemcitabine, vinorelbine) | PFS by IRC  | °OS<br>°ORR<br>°Time to OR<br>°DOR<br>°TTP<br>°CBR<br>°TEAE<br>°EORTC QLQ-C30                                           | Yes                                                                                                                | No | No | No | NA | NA |  |  |

|                                     |              |                            |                              |       |     |                                                                                                                 |                                                         |                                                                                                                                                                                                                                                                                                                                                                                            |                           |    |    |     |     |    |  |
|-------------------------------------|--------------|----------------------------|------------------------------|-------|-----|-----------------------------------------------------------------------------------------------------------------|---------------------------------------------------------|--------------------------------------------------------------------------------------------------------------------------------------------------------------------------------------------------------------------------------------------------------------------------------------------------------------------------------------------------------------------------------------------|---------------------------|----|----|-----|-----|----|--|
|                                     |              |                            |                              |       |     |                                                                                                                 |                                                         |                                                                                                                                                                                                                                                                                                                                                                                            | °Laboratory Abnormalities |    |    |     |     |    |  |
| <b>Immune checkpoint inhibitors</b> |              |                            |                              |       |     |                                                                                                                 |                                                         |                                                                                                                                                                                                                                                                                                                                                                                            |                           |    |    |     |     |    |  |
| Neoadjuvant                         | Atezolizumab | Impassion031 <sup>33</sup> | ClinicalTrials.gov<br>Pubmed | Roche | 333 | °chemotherapy + atezolizumab<br>°chemotherapy + placebo                                                         | °pCR<br>°pCR in PD-L1 positive tumors                   | °EFS<br>°EFS in PD-L1 positive tumors<br>°DFS<br>°DFS in PD-L1 positive tumors<br>°OS<br>°OS in PD-L1 positive tumors<br>°EORTC QLQ-C30<br>°TEAE<br>°Cmin<br>°Cmax<br>°ATA                                                                                                                                                                                                                 | Yes                       | No | No | Yes | 2.0 | No |  |
|                                     | Atezolizumab | Impassion050 <sup>34</sup> | ClinicalTrials.gov<br>Pubmed | Roche | 454 | °ddAC + paclitaxel/trastuzumab/pertuzumab + atezolizumab<br>°ddAC + paclitaxel/trastuzumab/pertuzumab + placebo | °pCR in PD-L1 positive tumors<br>°pCR in ITT population | °pCR by HR status<br>°pCR in PD-L1 negative tumors<br>°EFS<br>°DFS<br>°OS<br>°EORTC QLQ-C30<br>°TEAE<br>°Cmin<br>Atezolizumab<br>°Cmax<br>Atezolizumab<br>°Ctrough for Pertuzumab and Trastuzumab<br>°Cmin T-DM1<br>°Cmax T-DM1<br>°ATA<br>Atezolizumab, Trastuzumab, Pertuzumab, T-DM1<br>°pCR based on PIK3CA mutation<br>°EFS based on PIK3CA mutation<br>°DFS based on PIK3CA mutation | Yes                       | No | No | No  | NA  | NA |  |

|            |               |                            |                              |                         |      |                                                                                             |                                                                              |                                                                                                                                                                                                                                                                              |     |     |    |    |    |    |    |
|------------|---------------|----------------------------|------------------------------|-------------------------|------|---------------------------------------------------------------------------------------------|------------------------------------------------------------------------------|------------------------------------------------------------------------------------------------------------------------------------------------------------------------------------------------------------------------------------------------------------------------------|-----|-----|----|----|----|----|----|
|            |               |                            |                              |                         |      |                                                                                             |                                                                              | °OS based on PIK3CA mutation                                                                                                                                                                                                                                                 |     |     |    |    |    |    |    |
|            | Atezolizumab  | NeoTRIP <sup>35</sup>      | ClinicalTrials.gov<br>Pubmed | NA                      | 278  | °carboplatin/abraxane + surgery + AC<br>°carboplatin/abraxane + atezolizumab + surgery + AC | EFS                                                                          | °pCR<br>°COR<br>°DEFS<br>°TEAE                                                                                                                                                                                                                                               | No  | Yes | NA | NA | NA | NA | NA |
|            | Pembrolizumab | KEYNOTE522 <sup>36</sup>   | ClinicalTrials.gov<br>Pubmed | Merck Sharp & Dohme LLC | 1174 | °chemotherapy + pembrolizumab<br>°chemotherapy + placebo                                    | °pCR<br>°EFS                                                                 | °EFS in PD-L1 positive tumors<br>°OS<br>°TEAE<br>°EORTC QLQ-C30, EORTC QLQ-BR23                                                                                                                                                                                              | No  | No  | No | No | NA | NA | NA |
| Metastatic | Atezolizumab  | Impassion130 <sup>37</sup> | ClinicalTrials.gov<br>Pubmed | Roche                   | 902  | °nab-paclitaxel + atezolizumab<br>°nab-paclitaxel + placebo                                 | °PFS<br>°PFS in PD-L1 positive tumors<br>°OS<br>°OS in PD-L1 positive tumors | °ORR<br>°ORR in PD-L1 positive tumors<br>°DOR<br>°DOR in PD-L1 positive tumors<br>°EORTC QLQ-C30<br>°TEAE<br>°ATA<br>°Cmax<br>°Cmin<br>°Plasma concentrations<br>Paclitaxel                                                                                                  | Yes | No  | No | No | NA | NA | NA |
|            | Atezolizumab  | Impassion131 <sup>38</sup> | ClinicalTrials.gov<br>Pubmed | Roche                   | 651  | °paclitaxel + atezolizumab<br>°paclitaxel + placebo                                         | °PFS in PD-L1 positive tumors<br>°PFS in ITT population                      | °OS in PD-L1 positive tumors<br>°OS in ITT population<br>°% alive at 12 and 18m<br>°EORTC QLQ-C30<br>°% Alive without PD at 12m<br>°ORR in PD-L1 positive tumors<br>°ORR<br>°DOR<br>°CBR<br>°Cmin<br>Atezolizumab, Cmin Paclitaxel<br>°Cmax<br>Atezolizumab, Cmax Paclitaxel | Yes | No  | No | No | NA | NA | NA |



|               |                          |                              |                               |     |                                                                                                                                                                        |                                                                                                                                                      |                                                                                                                                                                                                                                                                           |                                                                        |    |    |    |    |    |  |  |
|---------------|--------------------------|------------------------------|-------------------------------|-----|------------------------------------------------------------------------------------------------------------------------------------------------------------------------|------------------------------------------------------------------------------------------------------------------------------------------------------|---------------------------------------------------------------------------------------------------------------------------------------------------------------------------------------------------------------------------------------------------------------------------|------------------------------------------------------------------------|----|----|----|----|----|--|--|
|               |                          |                              |                               |     |                                                                                                                                                                        |                                                                                                                                                      |                                                                                                                                                                                                                                                                           | °TEAE<br>°ATA<br>°OS by PD-L1 status<br>°PFS by PD-L1 status<br>°C-DOR |    |    |    |    |    |  |  |
| Pembrolizumab | KEYNOTE119 <sup>39</sup> | ClinicalTrials.gov<br>Pubmed | Merck<br>Sharp &<br>Dohme LLC | 622 | °pembrolizumab<br>°chemotherapy (capecitabine, eribulin,<br>gemcitabine, vinorelbine)                                                                                  | °OS in PD-L1 CPS ≥10<br>°OS in PD-L1 CPS ≥1<br>°OS                                                                                                   | °ORR in PD-L1 CPS ≥10<br>°ORR in PD-L1 CPS ≥1<br>°ORR<br>°PFS in PD-L1 CPS ≥10<br>°PFS in PD-L1 CPS ≥1<br>°PFS<br>°DOR in PD-L1 CPS ≥10<br>°DOR in PD-L1 CPS ≥1<br>°DOR<br>°DCR in PD-L1 CPS ≥10<br>°DCR in PD-L1 CPS ≥1<br>°DCR<br>°TEAE<br>°Discontinuation due to TEAE | No                                                                     | No | No | No | NA | NA |  |  |
| Pembrolizumab | KEYNOTE355 <sup>40</sup> | ClinicalTrials.gov<br>Pubmed | Merck<br>Sharp &<br>Dohme LLC | 882 | °pembrolizumab + nab-paclitaxel<br>°pembrolizumab + paclitaxel<br>°pembrolizumab + gemcitabine/carboplatin<br>°pembrolizumab + chemotherapy<br>°placebo + chemotherapy | °TEAE<br>°Discontinuation due to TEAE<br>°PFS<br>°PFS in PD-L1 CPS ≥1<br>°PFS in PD-L1 CPS ≥10<br>°OS<br>°OS in PD-L1 CPS ≥1<br>°OS in PD-L1 CPS ≥10 | °ORR in PD-L1 CPS ≥10<br>°ORR in PD-L1 CPS ≥1<br>°ORR<br>°DOR in PD-L1 CPS ≥10<br>°DOR in PD-L1 CPS ≥1<br>°DOR<br>°DCR in PD-L1 CPS ≥10<br>°DCR in PD-L1 CPS ≥1<br>°DCR<br>°TEAE                                                                                          | Yes                                                                    | No | No | No | NA | NA |  |  |

|                        |             |                           |                              |             |      |                                                                                                                                                              |             |                                                                                                                                                                           |     |    |    |    |    |    |  |
|------------------------|-------------|---------------------------|------------------------------|-------------|------|--------------------------------------------------------------------------------------------------------------------------------------------------------------|-------------|---------------------------------------------------------------------------------------------------------------------------------------------------------------------------|-----|----|----|----|----|----|--|
|                        |             |                           |                              |             |      |                                                                                                                                                              |             | °Discontinuation due to TEAE<br>°EORTC QLQ-C30,<br>EORTC QLQ-BR23                                                                                                         |     |    |    |    |    |    |  |
| <b>PARP inhibitors</b> |             |                           |                              |             |      |                                                                                                                                                              |             |                                                                                                                                                                           |     |    |    |    |    |    |  |
| Neoadjuvant            | Veliparib   | BrighTNess <sup>41</sup>  | ClinicalTrials.gov<br>Pubmed | AbbVie      | 634  | °veliparib + carboplatin + paclitaxel followed by AC<br>°placebo + carboplatin + paclitaxel followed by AC<br>°placebo + placebo + paclitaxel followed by AC | pCR         | °EFS<br>°OS<br>°BCR                                                                                                                                                       | No  | No | No | No | NA | NA |  |
| Adjuvant               | Olaparib    | OlympiA <sup>42</sup>     | ClinicalTrials.gov<br>Pubmed | AstraZeneca | 1836 | °olaparib<br>°placebo                                                                                                                                        | iDFS        | °DDFS<br>°OS<br>°Contralateral Breast Cancers, New Primary Ovarian Cancer, New Primary Fallopian Tube Cancer and New Primary Peritoneal Cancer<br>°FACIT-F, EORTC QLQ-C30 | NA  | No | No | No | NA | NA |  |
| Metastatic             | Iniparib    | NCT00938652 <sup>43</sup> | ClinicalTrials.gov<br>Pubmed | Sanofi      | 519  | °gemcitabine/carboplatin<br>°gemcitabine/carboplatin + iniparib                                                                                              | °PFS<br>°OS | °BOR<br>°ORR                                                                                                                                                              | Yes | No | No | No | NA | NA |  |
|                        | Olaparib    | OlympiAD <sup>44</sup>    | ClinicalTrials.gov<br>Pubmed | AstraZeneca | 302  | °olaparib<br>°TPC                                                                                                                                            | PFS         | °Time to second progression or death<br>°OS<br>°ORR<br>°EORTC QLQ-C30<br>°PFS by BICR                                                                                     | No  | No | No | No | NA | NA |  |
|                        | Olaparib    | LUCY <sup>45</sup>        | ClinicalTrials.gov<br>Pubmed | AstraZeneca | 256  | olaparib                                                                                                                                                     | PFS         | °OS<br>°TFST<br>°TSST<br>°TDT<br>°PFS on subsequent therapy<br>°CRR<br>°DOR<br>°TEAE                                                                                      | No  | No | No | No | NA | NA |  |
|                        | Talazoparib | EMBRACA <sup>46</sup>     | ClinicalTrials.gov<br>Pubmed | Pfizer      | 431  | °talazoparib<br>°TPC                                                                                                                                         | PFS         | °ORR<br>°OS                                                                                                                                                               | No  | No | No | No | NA | NA |  |

|                                   |           |                                      |                              |                     |     |                                                                                                                                       |     |                                                                                                                                                                                  |    |    |    |     |     |     |  |
|-----------------------------------|-----------|--------------------------------------|------------------------------|---------------------|-----|---------------------------------------------------------------------------------------------------------------------------------------|-----|----------------------------------------------------------------------------------------------------------------------------------------------------------------------------------|----|----|----|-----|-----|-----|--|
|                                   |           |                                      |                              |                     |     |                                                                                                                                       |     | °Cthrough<br>°TEAE<br>°Grade 3/4<br>Laboratory<br>Abnormalities<br>°Changes in vital<br>signs<br>°Concomitant<br>Medication                                                      |    |    |    |     |     |     |  |
|                                   | Veliparib | BROCADE3 <sup>47</sup>               | ClinicalTrials.gov<br>Pubmed | AbbVie              | 509 | °veliparib + carboplatin + paclitaxel<br>°placebo + carboplatin + paclitaxel                                                          | PFS | °OS<br>°CBR<br>°ORR<br>°PFS on<br>subsequent<br>therapy                                                                                                                          | No | No | No | No  | NA  | NA  |  |
| <b>Tyrosine kinase inhibitors</b> |           |                                      |                              |                     |     |                                                                                                                                       |     |                                                                                                                                                                                  |    |    |    |     |     |     |  |
| Neoadjuvant                       | Lapatinib | NSABP protocol<br>B-41 <sup>48</sup> | ClinicalTrials.gov<br>Pubmed | GlaxoSmith<br>Kline | 529 | °trastuzumab<br>°lapatinib                                                                                                            | pCR | °clinical complete<br>response<br>°cardiac events<br>°CTCAE side<br>adverse events                                                                                               | No | No | No | No  | NA  | NA  |  |
|                                   | Lapatinib | GeparQuinto <sup>49</sup>            | ClinicalTrials.gov<br>Pubmed | NA                  | 615 | °epirubicine/cyclofosfamide/trastuzumab<br>+ docetaxel/trastuzumab<br>°epirubicine/cyclofosfamide/lapatinib +<br>+docetaxel/lapatinib | pCR | °Toxic effects<br>°Compliance<br>°Response rate<br>physical<br>examination<br>°Response rate<br>imaging<br>°Breast<br>conservation rate<br>°pCR according to<br>diff definitions | No | No | No | Yes | 2.8 | Yes |  |
|                                   | Lapatinib | ALLIANCE <sup>50</sup>               | ClinicalTrials.gov<br>Pubmed | NA                  | 305 | °paclitaxel + trastuzumab<br>°paclitaxel + trastuzumab + lapatinib<br>°paclitaxel + lapatinib                                         | pCR | °pCR axilla<br>°adverse events                                                                                                                                                   | No | No | No | No  | NA  | NA  |  |
|                                   | Lapatinib | NeoALLTO <sup>51</sup>               | ClinicalTrials.gov<br>Pubmed | GlaxoSmith<br>Kline | 455 | °lapatinib<br>°trastuzumab<br>°lapatinib+trastuzumab                                                                                  | pCR | °locoregional total<br>pCR<br>°objective tumor<br>response rate<br>(physical<br>examination)<br>°Breast<br>conserving rate<br>°Node negativity<br>at surgery                     | No | No | No | No  | NA  | NA  |  |

|          |           |                       |                              |                          |      |                                                                                                        |                                         |                                                                                                                            |    |    |    |     |     |    |  |
|----------|-----------|-----------------------|------------------------------|--------------------------|------|--------------------------------------------------------------------------------------------------------|-----------------------------------------|----------------------------------------------------------------------------------------------------------------------------|----|----|----|-----|-----|----|--|
|          |           |                       |                              |                          |      |                                                                                                        |                                         | °Safety and tolerability<br>°DFS<br>°OS<br>°Biomarker expression                                                           |    |    |    |     |     |    |  |
|          | Lapatinib | EPHOS B <sup>52</sup> | ClinicalTrials.gov<br>Pubmed | Novartis                 | 257  | *no (neo)adjuvant therapy<br>°trastuzumab<br>°lapatinib<br>°lapatinib + trastuzumab                    | °Increase in apoptosis<br>°Ki67<br>°RFS | *Angiogenic serum markers<br>°Molecular markers<br>°Time to local recurrence<br>°Time to distant recurrence<br>°OS         | No | No | No | Yes | 4.0 | No |  |
|          | Pyrotinib | PHEdra <sup>53</sup>  | ClinicalTrials.gov<br>Pubmed | Jiangsu Hengrui Medicine | 355  | *trastuzumab/docetaxel/pyrotinib<br>°trastuzumab/docetaxel/placebo                                     | pCR                                     | *pCR rate peripheral vs central<br>°Overall response rate<br>°EFS<br>°DFS<br>°DDFS                                         | No | No | No | No  | NA  | NA |  |
| Adjuvant | Lapatinib | TEACH <sup>54</sup>   | ClinicalTrials.gov<br>Pubmed | GlaxoSmith Kline         | 3161 | *trastuzumab<br>°lapatinib                                                                             | DFS                                     | *time to recurrence<br>°OS<br>°Time to CNS recurrence<br>°QoL<br>°Toxic effects                                            | NA | No | No | No  | NA  | NA |  |
|          | Lapatinib | ALTO <sup>55</sup>    | ClinicalTrials.gov<br>Pubmed | Novartis                 | 8381 | *trastuzumab 52w<br>°lapatinib 52w<br>°trastuzumab + lapatinib 52w<br>°trastuzumab 12 -> lapatinib 34w | DFS                                     | *OS<br>°General Safety<br>°Cardiac Safety<br>°Time to recurrence<br>°Time to distant recurrence<br>°Time to CNS recurrence | NA | No | No | No  | NA  | NA |  |
|          | Neratinib | ExteNET <sup>56</sup> | Pubmed                       | Puma Biotechnology       | 2840 | After 1y trastuzumab<br>°neratinib<br>°placebo                                                         | iDFS                                    | *DFS for DCIS<br>°Time to distant recurrence<br>°Distant DFS<br>°Time to CNS recurrence<br>°Overall survival               | NA | No | No | No  | NA  | NA |  |

|            |           |                                 |                              |                                 |      |                                                         |                                                                      |                                                                                                     |                                                  |    |    |     |     |    |  |
|------------|-----------|---------------------------------|------------------------------|---------------------------------|------|---------------------------------------------------------|----------------------------------------------------------------------|-----------------------------------------------------------------------------------------------------|--------------------------------------------------|----|----|-----|-----|----|--|
|            |           |                                 |                              |                                 |      |                                                         |                                                                      | °Safety                                                                                             |                                                  |    |    |     |     |    |  |
| Metastatic | Lapatinib | NCT00078572 <sup>57</sup>       | ClinicalTrials.gov<br>Pubmed | GlaxoSmith<br>Kline             | 408  | °capecitabine<br>°capecitabine + lapatinib              | Time to<br>progression                                               | °PFS<br>°OS<br>°clinical benefit<br>rate<br>°Safety                                                 | Yes                                              | No | No | No  | NA  | NA |  |
|            | Lapatinib | EGF30001 <sup>58</sup>          | ClinicalTrials.gov<br>Pubmed | GlaxoSmith<br>Kline             | 579  | °paclitaxel + placebo<br>°paclitaxel + lapatinib        | Time to<br>progression                                               | °ORR<br>°CBR<br>°Time of response<br>°Event free<br>survival<br>°OS<br>°Safety                      | Yes                                              | No | No | No  | NA  | NA |  |
|            | Lapatinib | EGF104900 <sup>59</sup>         | ClinicalTrials.gov<br>Pubmed | GlaxoSmith<br>Kline             | 291  | °trastuzumab + lapatinib<br>°lapatinib                  | PFS                                                                  | °ORR<br>°CBR<br>°QOL<br>°OS                                                                         | Yes<br>(exception<br>of bone<br>only<br>disease) | No | No | No  | NA  | NA |  |
|            | Lapatinib | NCT00073528 <sup>60</sup>       | ClinicalTrials.gov<br>Pubmed | Novartis<br>GlaxoSmith<br>Kline | 1286 | °letrozole + lapatinib<br>°letrozole + placebo          | PFS                                                                  | °ORR<br>°CBR<br>°OS<br>°Safety<br>°PFS                                                              | No                                               | No | No | No  | NA  | NA |  |
|            | Lapatinib | NCT00281658 <sup>61</sup>       | ClinicalTrials.gov<br>Pubmed | Novartis                        | 444  | °paclitaxel + placebo<br>°paclitaxel + lapatinib        | OS 53m                                                               | °OS 190m<br>°PFS<br>°ORR<br>°TTR<br>°Safety<br>°CBR<br>°DOR                                         | Yes                                              | No | No | Yes | 4.7 | No |  |
|            | Lapatinib | NCIC CTG<br>MA.31 <sup>62</sup> | ClinicalTrials.gov<br>Pubmed | Novartis                        | 537  | °taxane + lapatinib<br>°taxane + trastuzumab            | PFS                                                                  | °OS<br>°ORR<br>°TTR<br>°DOR<br>°CBR<br>°Adverse Events<br>(AEs)<br>°QoL                             | No                                               | No | No | No  | NA  | NA |  |
|            | Lapatinib | CEREBEL <sup>63</sup>           | ClinicalTrials.gov<br>Pubmed | Novartis                        | 540  | °capecitabine +trastuzumab<br>°capecitabine + lapatinib | Number of<br>participants<br>with CNS as<br>first site of<br>relapse | °PFS<br>°Time to first CNS<br>progression<br>°Incidence of CNS<br>progression at any<br>time<br>°OS | No                                               | No | No | No  | NA  | NA |  |

|           |                           |                              |                                 |     |                                                                                                                                                                                   |                                                           |                                                                                                                                |                                                  |    |    |     |     |    |  |  |
|-----------|---------------------------|------------------------------|---------------------------------|-----|-----------------------------------------------------------------------------------------------------------------------------------------------------------------------------------|-----------------------------------------------------------|--------------------------------------------------------------------------------------------------------------------------------|--------------------------------------------------|----|----|-----|-----|----|--|--|
|           |                           |                              |                                 |     |                                                                                                                                                                                   |                                                           |                                                                                                                                | °ORR<br>°DOR<br>°Safety                          |    |    |     |     |    |  |  |
| Lapatinib | ALTERNATIVE <sup>64</sup> | ClinicalTrials.gov<br>Pubmed | Novartis<br>GlaxoSmith<br>Kline | 355 | °lapatinib + trastuzumab + AI<br>°trastuzumab + AI<br>°lapatinib + AI                                                                                                             | PFS<br>(radiologic<br>and non-<br>radiologic<br>response) | °OS<br>°ORR<br>°CBR<br>°Duration of<br>response<br>°QoL                                                                        | No                                               | No | No | No  | NA  | NA |  |  |
| Lapatinib | DETECT III <sup>65</sup>  | ClinicalTrials.gov<br>Pubmed | NA                              | 254 | °standard therapy<br>°standard therapy + lapatinib                                                                                                                                | PFS                                                       | °ORR<br>°CBR<br>°OS<br>°Dynamic of CTC<br>°QoL<br>°Safety and<br>Tolerability<br>°Intensity of Pain<br>°Level of<br>Compliance | No                                               | No | No | Yes | 9.8 | No |  |  |
| Lapatinib | NCT00508274 <sup>66</sup> | Pubmed                       | Novartis                        | 52  | °lapatinib + capecitabine                                                                                                                                                         | CBR                                                       | °PFS<br>°TTR<br>°DOR<br>°CNS as first<br>relapse<br>°Safety                                                                    | Yes                                              | No | No | No  | NA  | NA |  |  |
| Lapatinib | NCT00272987 <sup>67</sup> | Pubmed                       | Novartis                        | 63  | °lapatinib (1000mg) + paclitaxel<br>(80mg/m <sup>2</sup> )<br>°lapatinib (1000mg) + paclitaxel<br>(70mg/m <sup>2</sup> )<br>lapatinib (750mg) + paclitaxel (80mg/m <sup>2</sup> ) | Safety and<br>tolerability                                | °CBR<br>°PFS<br>°TTR<br>°DOR                                                                                                   | Yes                                              | No | No | No  | NA  | NA |  |  |
| Lapatinib | CALGB 40302 <sup>68</sup> | Pubmed                       | NA                              | 295 | °fulvestrant + lapatinib<br>°fulvestrant + placebo                                                                                                                                | PFS                                                       | °Toxicity<br>°Objective tumor<br>response<br>°OS                                                                               | Yes<br>(exception<br>of bone<br>only<br>disease) | No | No | No  | NA  | NA |  |  |
| Neratinib | NALA <sup>69</sup>        | Pubmed                       | Puma Bio-<br>technology         | 621 | °capecitabine + neratinib<br>°capecitabine + lapatinib                                                                                                                            | °PFS<br>°OS                                               | °Time to<br>intervention for<br>CNS<br>°ORR<br>°Investigator<br>assessed PFS<br>°CBR<br>°DOR<br>°HRQoL<br>°Safety              | Yes                                              | No | No | No  | NA  | NA |  |  |

|                        |            |                                       |                              |                                |      |                                                                                                                                                                                                                                                                                         |                        |                                                                                               |                                                  |    |    |     |      |     |
|------------------------|------------|---------------------------------------|------------------------------|--------------------------------|------|-----------------------------------------------------------------------------------------------------------------------------------------------------------------------------------------------------------------------------------------------------------------------------------------|------------------------|-----------------------------------------------------------------------------------------------|--------------------------------------------------|----|----|-----|------|-----|
|                        | Pyrotinib  | PHOEBE <sup>70</sup>                  | ClinicalTrials.gov<br>Pubmed | Jiangsu<br>HengRui<br>Medicine | 267  | °capecitabine + pyrotinib<br>°capecitabine + lapatinib                                                                                                                                                                                                                                  | PFS                    | °Safety<br>°OS<br>°ORR<br>°TTP<br>°DOR<br>°CBR                                                | Yes                                              | No | No | No  | NA   | NA  |
|                        | Pyrotinib  | Phenix <sup>71</sup>                  | ClinicalTrials.gov           | Jiangsu<br>HengRui<br>Medicine | 279  | °capecitabine + pyrotinib<br>°capecitabine + placebo                                                                                                                                                                                                                                    | PFS by IRC             | °PFS by<br>investigator<br>°ORR<br>°Disease control<br>rate<br>°CBR<br>°DOR<br>°OS<br>°Safety | Yes                                              | No | No | No  | NA   | NA  |
| <b>mTOR inhibitors</b> |            |                                       |                              |                                |      |                                                                                                                                                                                                                                                                                         |                        |                                                                                               |                                                  |    |    |     |      |     |
| Neoadjuvant            | Everolimus | GeparQuinto <sup>72</sup>             | ClinicalTrials.gov<br>Pubmed | NA                             | 1948 | °epirubicine/cyclofosfamide/trastuzumab<br>+ docetaxel/trastuzumab<br>°epirubicine/cyclofosfamide/lapatinib +<br>+docetaxel/lapatinib<br>°paclitaxel<br>°epirubicine/cyclofosfamide + docetaxel<br>°epirubicine/cyclofosfamide + docetaxel +<br>bevacuzimab<br>°paclitaxel + everolimus | pCR                    | °DFS<br>°LRFs<br>°LRRFS<br>°RRFS<br>°DDFS<br>°Cerebral DFS<br>°OS                             | No                                               | No | No | Yes | 10.8 | Yes |
| Adjuvant               | Everolimus | NCT01805271 <sup>73</sup>             | ClinicalTrials.gov<br>Pubmed | NA                             | 1278 | °endocrine therapy + everolimus<br>°endocrine therapy + placebo                                                                                                                                                                                                                         | DFS                    | °OS<br>°EFS<br>°Distant<br>metastases - FS<br>°Second<br>malignancies<br>°Toxicity            | NA                                               | No | No | No  | NA   | NA  |
|                        | Everolimus | MAINtenance<br>Afinitor <sup>74</sup> | ClinicalTrials.gov<br>Pubmed | NA                             | 110  | °endocrine therapy + everolimus<br>°endocrine therapy + placebo                                                                                                                                                                                                                         | PFS                    | °ORR<br>°OS<br>°Safety                                                                        | NA                                               | No | No | Yes | 16.3 | No  |
| Metastatic             | Everolimus | 4EVER <sup>75</sup>                   | ClinicalTrials.gov<br>Pubmed | Novartis                       | 281  | °everolimus + exemestane<br>°exemestane                                                                                                                                                                                                                                                 | ORR                    | °PFS<br>°ORR<br>°OS<br>°Safety<br>°Resource<br>utilization<br>°HRQoL                          | Yes<br>(exception<br>of bone<br>only<br>disease) | No | No | No  | NA   | NA  |
|                        | Everolimus | Everexes <sup>76</sup>                | ClinicalTrials.gov           | Novartis                       | 235  | everolimus + exemestane                                                                                                                                                                                                                                                                 | Safety<br>Tolerability | °ORR<br>°CBR<br>°TTD                                                                          | Yes<br>(exception<br>of bone                     | No | No | No  | NA   | NA  |

|              |                           |                              |                         |      |                                                                                                                    |                                        |                                                                                                                                                                                                     |                                      |               |    |     |      |     |  |  |
|--------------|---------------------------|------------------------------|-------------------------|------|--------------------------------------------------------------------------------------------------------------------|----------------------------------------|-----------------------------------------------------------------------------------------------------------------------------------------------------------------------------------------------------|--------------------------------------|---------------|----|-----|------|-----|--|--|
|              |                           |                              |                         |      |                                                                                                                    |                                        |                                                                                                                                                                                                     |                                      | only disease) |    |     |      |     |  |  |
| Everolimus   | Bolero-1 <sup>77</sup>    | ClinicalTrials.gov<br>Pubmed | Novartis                | 719  | *trastuzumab + paclitaxel + everolimus<br>*trastuzumab + paclitaxel + placebo                                      | PFS                                    | °OS<br>°objective response rate<br>°CBR<br>°Safety                                                                                                                                                  | Yes (exception of bone only disease) | No            | No | No  | NA   | NA  |  |  |
| Everolimus   | Bolero-2 <sup>78</sup>    | ClinicalTrials.gov<br>Pubmed | Novartis                | 724  | *everolimus + exemestane<br>*exemestane                                                                            | PFS                                    | °ORR<br>°CBR<br>°OS<br>°QoL<br>°Safety<br>°changes in bone marker levels                                                                                                                            | No                                   | No            | No | No  | NA   | NA  |  |  |
| Everolimus   | Bolero-3 <sup>79</sup>    | ClinicalTrials.gov<br>Pubmed | Novartis                | 569  | *trastuzumab + vinorelbine + everolimus<br>*trastuzumab + vinorelbine + placebo                                    | PFS                                    | °OS<br>°objective response rate<br>°CBR<br>°Safety                                                                                                                                                  | No                                   | No            | No | No  | NA   | NA  |  |  |
| Everolimus   | BALLET <sup>80</sup>      | Pubmed                       | Novartis                | 1151 | *everolimus + exemestane                                                                                           | Safety                                 | *Grade 3-4 AE                                                                                                                                                                                       | No                                   | No            | No | No  | NA   | NA  |  |  |
| Everolimus   | SWOG 1222 <sup>81</sup>   | ClinicalTrials.gov<br>Pubmed | AstraZeneca<br>Novartis | 37   | *fulvestrant + placebo + placebo<br>*fulvestrant + everolimus + placebo<br>*fulvestrant + everolimus + anastrozole | PFS                                    | °OS<br>°Adverse Events<br>°CTC analyses                                                                                                                                                             | No                                   | No            | No | No  | NA   | NA  |  |  |
| Everolimus   | INPRES <sup>82</sup>      | ClinicalTrials.gov           | NA                      | 44   | *exemestane + everolimus                                                                                           | Everolimus<br>AUC                      | *Correlation early metabolic response and PFS<br>*Correlation early metabolic response and AUC<br>*Effect dose escalation on metabolic response<br>*Correlation AUC and frequency of adverse events | No                                   | No            | No | Yes | 26.0 | Yes |  |  |
| Everolimus   | IMPROVE <sup>83</sup>     | Pubmed                       | NA                      | 77   | *exemestane + everolimus<br>*capecitabine + bevacizumab                                                            | Patient preference for type of therapy | *PFS<br>°OS<br>*treatment satisfaction<br>°QoL<br>°Safety                                                                                                                                           | No                                   | No            | No | Yes | 24.7 | No  |  |  |
| Temsirolimus | NCT00083993 <sup>84</sup> | ClinicalTrials.gov<br>Pubmed | Pfizer                  | 1112 | *letrozole + placebo<br>*letrozole + temsirolimus                                                                  | PFS                                    | °OS<br>°Tumor response<br>°Clinical benefit                                                                                                                                                         | Yes                                  | No            | No | No  | NA   | NA  |  |  |



|                                    |             |                            |                              |          |      |                                                     |                        |                                                                                                                                                                                         |                                      |    |    |     |      |    |
|------------------------------------|-------------|----------------------------|------------------------------|----------|------|-----------------------------------------------------|------------------------|-----------------------------------------------------------------------------------------------------------------------------------------------------------------------------------------|--------------------------------------|----|----|-----|------|----|
|                                    |             |                            |                              |          |      |                                                     |                        | °TTP<br>°DOR<br>°TTF<br>°Safety<br>°QoL                                                                                                                                                 |                                      |    |    |     |      |    |
| <b>PI3K/AKT pathway inhibitors</b> |             |                            |                              |          |      |                                                     |                        |                                                                                                                                                                                         |                                      |    |    |     |      |    |
| Metastatic                         | Alpelisib   | SOLAR1 <sup>85</sup>       | ClinicalTrials.gov           | Novartis | 572  | °fulvestrant + alpelisib<br>°fulvestrant + placebo  | PFS                    | °OS<br>°Subgroup analyses PIK3CA<br>°PFS according to ctDNA<br>°Overall response<br>°CBR<br>°Safety                                                                                     | Yes (exception of bone only disease) | No | No | No  | NA   | NA |
|                                    | Buparlisib  | BELLE2 <sup>86</sup>       | Pubmed                       | Novartis | 1147 | °fulvestrant + buparlisib<br>°fulvestrant + placebo | PFS                    | °OS<br>°CBR<br>°ORR<br>°PK<br>°Safety<br>°QoL                                                                                                                                           | No                                   | No | No | Yes | 13.0 | No |
|                                    | Buparlisib  | BELLE3 <sup>87</sup>       | ClinicalTrials.gov<br>Pubmed | Novartis | 432  | °fulvestrant + buparlisib<br>°fulvestrant + placebo | PFS by investigator    | °OS<br>°PFS by PIK3CA<br>°OS by PIK3CA<br>°ORR by PIK3CA<br>°CBR by PIK3CA<br>°Safety and Tolerability<br>°PK<br>°HRQoL<br>°Time to Definitive Deterioration of ECOG Performance Status | Yes                                  | No | No | No  | NA   | NA |
|                                    | Buparlisib  | BELLE4 <sup>88</sup>       | ClinicalTrials.gov           | Novartis | 416  | °paclitaxel + buparlisib<br>°paclitaxel + placebo   | °PFS<br>°PFS by PIK3CA | °OS<br>°ORR<br>°CBR<br>°PK<br>°Safety                                                                                                                                                   | No                                   | No | No | No  | NA   | NA |
|                                    | Ipatasertib | IPATunity130 <sup>89</sup> | ClinicalTrials.gov           | Roche    | 222  | °paclitaxel + ipatasertib<br>°paclitaxel + placebo  | PFS                    | °OS<br>°ORR<br>°DOR<br>°CBR<br>°Safety                                                                                                                                                  | Yes                                  | No | No | No  | NA   | NA |

|               |              |                             |                              |                        |     |                                                           |                                                                             |                                                                                          |                                      |    |    |    |    |    |  |
|---------------|--------------|-----------------------------|------------------------------|------------------------|-----|-----------------------------------------------------------|-----------------------------------------------------------------------------|------------------------------------------------------------------------------------------|--------------------------------------|----|----|----|----|----|--|
|               |              |                             |                              |                        |     |                                                           |                                                                             | *Patient reported Outcomes                                                               |                                      |    |    |    |    |    |  |
|               | Taselisib    | SANDPIPER <sup>90</sup>     | ClinicalTrials.gov           | Roche                  | 631 | *fulvestrant + taselisib<br>*fulvestrant + placebo        | PFS by investigator                                                         | *OS<br>*CBR<br>*Duration of objective response<br>*BICR-PFS<br>*TTD<br>*HRQoL<br>*Safety | No                                   | No | No | No | NA | NA |  |
|               | Capivasertib | Capitello 291 <sup>91</sup> | ClinicalTrials.gov<br>Pubmed | AstraZeneca            | 708 | *fulvestrant + capivasertib<br>*fulvestrant + placebo     | PFS by investigator                                                         | *OS<br>*ORR<br>*Safety                                                                   | Yes (exception of bone only disease) | No | No | No | NA | NA |  |
| <b>Others</b> |              |                             |                              |                        |     |                                                           |                                                                             |                                                                                          |                                      |    |    |    |    |    |  |
| Metastatic    | Tucidinostat | ACE <sup>92</sup>           | ClinicalTrials.gov<br>Pubmed | Chipscreen Biosciences | 365 | *tucidinostat+ exemestane<br>*placebo + exemestane        | *PFS<br>*PK<br>Chidamide, PK<br>Exemestane<br>*Acetylation level histone H3 | *OS<br>*DOR<br>*ORR<br>*CBR                                                              | Yes                                  | No | No | No | NA | NA |  |
|               | Margetuximab | SOPHIA <sup>93</sup>        | ClinicalTrials.gov<br>Pubmed | Macro-Genics           | 536 | *margetuximab + chemotherapy<br>*trastuzumab + exemestane | *PFS<br>*OS<br>*Grade 3 CTCEA                                               | *ORR<br>*Safety                                                                          | No                                   | No | No | No | NA | NA |  |

AC: anthracycline; AE: adverse events; AEPI: Adverse Events of Primary Interest; AESI: Adverse Events of Special Interest; AI: aromatase inhibition; ATA: anti-therapeutic antibodies; AUC: area under the curve; BCS: breast conserving surgery; BICR: Blinded independent central reviews; BOR: best overall response rate; CBR: clinical benefit rate; C-DOR: duration of confirmed response; Cmax: maximum concentration; Cmin: minimum concentration; CNS: central nervous system; CPS: combined positive score; Ctrough: trough concentration; CRR: clinical response rate; CTC: circulating tumor cell; CTCEA: Common Terminology Criteria for Adverse Events; ctDNA: circulating tumor DNA; DCIS: ductal carcinoma in situ; DCR: disease control rate; ddAC: dose-dense anthracycline; DDFS: distant disease free survival; DEFS: distant event free survival; DFS: disease free survival; DM1: emtansine; DOR: duration of response; DRFI: distant recurrence free interval; DRFS: distant recurrence free survival; EFS: event free survival; ECOG: Eastern Cooperative Oncology Group; EORTC QLQ-BM22: The European Organisation for Research and Treatment of Cancer Quality of Life Questionnaire for patients with bone metastases; EORTC QLQ-BR23: The European Organization for Research and Treatment of Cancer Breast Cancer-Specific Quality of Life Questionnaire; EORTC QLQ-C30: European Organization for Research and Treatment of Cancer Quality of Life Questionnaire Version 3.0; EQ-5D-5L: Euro Quality of Life 5 dimensions 5 level; ER: estrogen receptor; FACIT-F: Functional Assessment of Chronic Illness Therapy – Fatigue; FACT-B: Functional Assessment of Cancer Therapy – Breast; FACT-C: Functional Assessment of Cancer Therapy Colorectal Cancer Module; FACT-TaxS: Functional Assessment of Cancer Therapy Taxane Score; HR: hormone receptor; HRQoL: Health Related Quality of Life; iDFS: invasive disease free survival; ILC: invasive lobular carcinoma; IRC: independent review committee; ITT: intention to treat; NA: not applicable; LRFs: local recurrence free survival; LRRFS: locoregional recurrence free survival; LVEF: left ventricular ejection fraction; mBPI-sf: modified Brief Pain Inventory-short form; OR: objective response; ORR: overall response rate; OS: overall survival; pCR: pathological complete response; PD: progressive disease; PFS: progression free survival; PK: pharmacokinetics; QALY: quality adjusted life year; QOL: quality of life; QTC: QT duration corrected for heart rate; RFS: recurrence free survival; RSCL: Rotterdam Symptom Checklist; SAE: serious adverse events; SERD: selective estrogen receptor degrader; SOC: standard of care; T-DM1: trastuzumab-emtansine; TDT: Time to Study Treatment Discontinuation or Death; T-DXd: trastuzumab-deruxtecan; TEAE: treatment emergent adverse event; TFST: time to first subsequent therapy; TMB: tumour mutational burden; TPC: treatment of physician's choice; TSST: time to second subsequent therapy; TTD: time to deterioration; TTF: time to treatment failure; TTP: time to progression; TTR: time to response; WPAI: Work Productivity and Activity Impairment

## References

1. Alsaleh, K. *et al.* Neoadjuvant endocrine therapy with or without palbociclib in low-risk patients: a phase III randomized double-blind SAFIA trial. *J Cancer Res Clin Oncol* **1** (2023) doi:10.1007/S00432-023-04588-3.
2. Harbeck, N. *et al.* Adjuvant abemaciclib combined with endocrine therapy for high-risk early breast cancer: updated efficacy and Ki-67 analysis from the monarchE study. *Annals of Oncology* **32**, 1571–1581 (2021).
3. Loibl, S. *et al.* Palbociclib for residual high-risk invasive HR-positive and HER2-negative early breast cancer—the penelope-B trial. *Journal of Clinical Oncology* **39**, 1518–1530 (2021).
4. Gnant, M. *et al.* Adjuvant Palbociclib for Early Breast Cancer: The PALLAS Trial Results (ABCSG-42/AFT-05/BIG-14-03). *J Clin Oncol* **40**, 282–293 (2022).
5. Sledge, G. W. *et al.* MONARCH 2: Abemaciclib in combination with fulvestrant in women with HR+/HER2-advanced breast cancer who had progressed while receiving endocrine therapy. *Journal of Clinical Oncology* **35**, 2875–2884 (2017).
6. Johnston, S. *et al.* MONARCH 3 final PFS: a randomized study of abemaciclib as initial therapy for advanced breast cancer. *NPJ Breast Cancer* **5**, (2019).
7. Zhang, Q. Y. *et al.* MONARCH plus: abemaciclib plus endocrine therapy in women with HR+/HER2– advanced breast cancer: the multinational randomized phase III study. *Ther Adv Med Oncol* **12**, (2020).
8. Finn, R. S. *et al.* Palbociclib and Letrozole in Advanced Breast Cancer. *New England Journal of Medicine* **375**, 1925–1936 (2016).
9. Cristofanilli, M. *et al.* Fulvestrant plus palbociclib versus fulvestrant plus placebo for treatment of hormone-receptor-positive, HER2-negative metastatic breast cancer that progressed on previous endocrine therapy (PALOMA-3): final analysis of the multicentre, double-blind, phase 3 randomised controlled trial. *Lancet Oncol* **17**, 425–439 (2016).
10. Xu, B. *et al.* Palbociclib plus letrozole versus placebo plus letrozole in Asian postmenopausal women with oestrogen receptor-positive/human epidermal growth factor receptor 2-negative advanced breast cancer: Primary results from PALOMA-4. *Eur J Cancer* **175**, 236–245 (2022).
11. Bidard, F. C. *et al.* Switch to fulvestrant and palbociclib versus no switch in advanced breast cancer with rising ESR1 mutation during aromatase inhibitor and palbociclib therapy (PADA-1): a randomised, open-label, multicentre, phase 3 trial. *Lancet Oncol* **23**, 1367–1377 (2022).
12. Martín, M. *et al.* Overall survival with palbociclib plus endocrine therapy versus capecitabine in postmenopausal patients with hormone receptor-positive, HER2-negative metastatic breast cancer in the PEARL study. *Eur J Cancer* **168**, 12–24 (2022).
13. Hortobagyi, G. N. *et al.* Updated results from MONALEESA-2, a phase III trial of first-line ribociclib plus letrozole versus placebo plus letrozole in hormone receptor-positive, HER2-negative advanced breast cancer. *Annals of Oncology* **29**, 1541–1547 (2018).
14. Slamon, D. J. *et al.* Phase III randomized study of ribociclib and fulvestrant in hormone receptor-positive, human epidermal growth factor receptor 2-negative advanced breast cancer: MONALEESA-3. *Journal of Clinical Oncology* **36**, 2465–2472 (2018).
15. Tripathy, D. *et al.* Ribociclib plus endocrine therapy for premenopausal women with hormone-receptor-positive, advanced breast cancer (MONALEESA-7): a randomised phase 3 trial. *Lancet Oncol* **19**, 904–915 (2018).
16. Peuker, C. A. *et al.* Treatment with ribociclib shows favourable immunomodulatory effects in patients with hormone receptor-positive breast cancer—findings from the RIBECCA trial. *Eur J Cancer* **162**, 45–55 (2022).
17. De Laurentiis, M. *et al.* Full population results from the core phase of CompLEEment-1, a phase 3b study of ribociclib plus letrozole as first-line therapy for advanced breast cancer in an expanded population. *Breast Cancer Res Treat* **189**, 689 (2021).
18. Malorni, L. *et al.* Serum thymidine kinase activity in patients with HR-positive/HER2-negative advanced breast cancer treated with ribociclib plus letrozole: Results from the prospective BioltaLEE trial. *Eur J Cancer* **186**, 1–11 (2023).
19. Bidard, F. C. *et al.* Elacestrant (oral selective estrogen receptor degrader) Versus Standard Endocrine Therapy for Estrogen Receptor-Positive, Human Epidermal Growth Factor Receptor 2-Negative Advanced Breast Cancer: Results From the Randomized Phase III EMERALD Trial. *Journal of Clinical Oncology* **40**, 3246 (2022).
20. Hurvitz, S. A. *et al.* Neoadjuvant trastuzumab, pertuzumab, and chemotherapy versus trastuzumab emtansine plus pertuzumab in patients with HER2-positive breast cancer (KRISTINE): a randomised, open-label, multicentre, phase 3 trial. *Lancet Oncol* **19**, 115–126 (2018).
21. Krop, I. E. *et al.* Trastuzumab Emtansine Plus Pertuzumab Versus Taxane Plus Trastuzumab Plus Pertuzumab After Anthracycline for High-Risk Human Epidermal Growth Factor Receptor 2-Positive Early Breast Cancer: The Phase III KAITLIN Study. *Journal of Clinical Oncology* **40**, 438 (2022).
22. von Minckwitz, G. *et al.* Trastuzumab Emtansine for Residual Invasive HER2-Positive Breast Cancer. *New England Journal of Medicine* **380**, 617–628 (2019).
23. Diéras, V. *et al.* Trastuzumab emtansine versus capecitabine plus lapatinib in patients with previously treated HER2-positive advanced breast cancer (EMILIA): a descriptive analysis of final overall survival results from a randomised, open-label, phase 3 trial. *Lancet Oncol* **18**, 732 (2017).

24. Krop, I. E. *et al.* Trastuzumab emtansine versus treatment of physician's choice in patients with previously treated HER2-positive metastatic breast cancer (TH3RESA): final overall survival results from a randomised open-label phase 3 trial. *Lancet Oncol* **18**, 743–754 (2017).
25. Wuerstlein, R. *et al.* Final results of the global and Asia cohorts of KAMILLA, a phase IIIB safety trial of trastuzumab emtansine in patients with HER2-positive advanced breast cancer. *ESMO Open* **7**, 100561 (2022).
26. Perez, E. A. *et al.* Trastuzumab emtansine with or without pertuzumab versus trastuzumab with taxane for human epidermal growth factor receptor 2–positive advanced breast cancer: Final results from MARIANNE. *Cancer* **125**, 3974–3984 (2019).
27. Wang, X. *et al.* Primary results of ELAINA: a randomized, multicenter, open-label, phase III study of the efficacy and safety of trastuzumab emtansine vs . lapatinib plus capecitabine in Chinese patients with HER2-positive locally advanced or metastatic breast cancer who have received prior trastuzumab-based therapy. *Translational Breast Cancer Research* **4**, 3–3 (2023).
28. André, F. *et al.* Trastuzumab deruxtecan versus treatment of physician's choice in patients with HER2-positive metastatic breast cancer (DESTINY-Breast02): a randomised, open-label, multicentre, phase 3 trial. *The Lancet* **401**, 1773–1785 (2023).
29. Cortés, J. *et al.* Trastuzumab Deruxtecan versus Trastuzumab Emtansine for Breast Cancer. *New England Journal of Medicine* **386**, 1143–1154 (2022).
30. Modi, S. *et al.* Trastuzumab Deruxtecan in Previously Treated HER2-Low Advanced Breast Cancer. *New England Journal of Medicine* **387**, 9–20 (2022).
31. Rugo, H. S. *et al.* Sacituzumab Govitecan in Hormone Receptor-Positive/Human Epidermal Growth Factor Receptor 2-Negative Metastatic Breast Cancer. *Journal of Clinical Oncology* **40**, 3365–3376 (2022).
32. Bardia, A. *et al.* Sacituzumab Govitecan in Metastatic Triple-Negative Breast Cancer. *New England Journal of Medicine* **384**, 1529–1541 (2021).
33. Mittendorf, E. A. *et al.* Neoadjuvant atezolizumab in combination with sequential nab-paclitaxel and anthracycline-based chemotherapy versus placebo and chemotherapy in patients with early-stage triple-negative breast cancer (IMpassion031): a randomised, double-blind, phase 3 trial. *The Lancet* **396**, 1090–1100 (2020).
34. Huober, J. *et al.* Atezolizumab With Neoadjuvant Anti-Human Epidermal Growth Factor Receptor 2 Therapy and Chemotherapy in Human Epidermal Growth Factor Receptor 2–Positive Early Breast Cancer: Primary Results of the Randomized Phase III IMpassion050 Trial. *Journal of Clinical Oncology* **40**, 2946 (2022).
35. Gianni, L. *et al.* Pathologic complete response (pCR) to neoadjuvant treatment with or without atezolizumab in triple-negative, early high-risk and locally advanced breast cancer: NeoTRIP Michelangelo randomized study. *Annals of Oncology* **33**, 534–543 (2022).
36. Schmid, P. *et al.* Event-free Survival with Pembrolizumab in Early Triple-Negative Breast Cancer. *New England Journal of Medicine* **386**, 556–567 (2022).
37. Schmid, P. *et al.* Atezolizumab and Nab-Paclitaxel in Advanced Triple-Negative Breast Cancer. *New England Journal of Medicine* **379**, 2108–2121 (2018).
38. Miles, D. *et al.* Primary results from IMpassion131, a double-blind, placebo-controlled, randomised phase III trial of first-line paclitaxel with or without atezolizumab for unresectable locally advanced/metastatic triple-negative breast cancer. *Annals of Oncology* **32**, 994–1004 (2021).
39. Winer, E. P. *et al.* Pembrolizumab versus investigator-choice chemotherapy for metastatic triple-negative breast cancer (KEYNOTE-119): a randomised, open-label, phase 3 trial. *Lancet Oncol* **22**, 499–511 (2021).
40. Cortes, J. *et al.* Pembrolizumab plus Chemotherapy in Advanced Triple-Negative Breast Cancer. *New England Journal of Medicine* **387**, 217–226 (2022).
41. Loibl, S. *et al.* Addition of the PARP inhibitor veliparib plus carboplatin or carboplatin alone to standard neoadjuvant chemotherapy in triple-negative breast cancer (BrighTNess): a randomised, phase 3 trial. *Lancet Oncol* **19**, 497–509 (2018).
42. Tutt, A. N. J. *et al.* Adjuvant Olaparib for Patients with BRCA1- or BRCA2-Mutated Breast Cancer. *N Engl J Med* **384**, 2394 (2021).
43. O'Shaughnessy, J. *et al.* Phase III study of iniparib plus gemcitabine and carboplatin versus gemcitabine and carboplatin in patients with metastatic triple-negative breast cancer. *Journal of Clinical Oncology* **32**, 3840–3847 (2014).
44. Robson, M. *et al.* Olaparib for Metastatic Breast Cancer in Patients with a Germline BRCA Mutation . *New England Journal of Medicine* **377**, 523–533 (2017).
45. Gelmon, K. A. *et al.* Clinical effectiveness of olaparib monotherapy in germline BRCA-mutated, HER2-negative metastatic breast cancer in a real-world setting: phase IIIB LUCY interim analysis. *Eur J Cancer* **152**, 68–77 (2021).
46. Litton, J. K. *et al.* Talazoparib in Patients with Advanced Breast Cancer and a Germline BRCA Mutation . *New England Journal of Medicine* **379**, 753–763 (2018).
47. Diéras, V. *et al.* Veliparib with carboplatin and paclitaxel in BRCA-mutated advanced breast cancer (BROCADE3): a randomised, double-blind, placebo-controlled, phase 3 trial. *Lancet Oncol* **21**, 1269–1282 (2020).
48. Robidoux, A. *et al.* Lapatinib as a component of neoadjuvant therapy for HER2-positive operable breast cancer (NSABP protocol B-41): an open-label, randomised phase 3 trial. *Lancet Oncol* **14**, 1183–1192 (2013).
49. Untch, M. *et al.* Lapatinib versus trastuzumab in combination with neoadjuvant anthracycline-taxane-based chemotherapy (GeparQuinto, GBG 44): a randomised phase 3 trial. *Lancet Oncol* **13**, 135–144 (2012).

50. Carey, L. A. *et al.* Molecular Heterogeneity and Response to Neoadjuvant Human Epidermal Growth Factor Receptor 2 Targeting in CALGB 40601, a Randomized Phase III Trial of Paclitaxel Plus Trastuzumab With or Without Lapatinib. *Journal of Clinical Oncology* **34**, 542 (2016).
51. Baselga, J. *et al.* Lapatinib with trastuzumab for HER2-positive early breast cancer (NeoALTTO): a randomised, open-label, multicentre, phase 3 trial. *Lancet* **379**, 633 (2012).
52. Bundred, N. *et al.* Combined Perioperative Lapatinib and Trastuzumab in Early HER2-Positive Breast Cancer Identifies Early Responders: Randomized UK EPHOS-B Trial Long-Term Results. *Clinical Cancer Research* **28**, 1323 (2022).
53. Wu, J. *et al.* Neoadjuvant pyrotinib, trastuzumab, and docetaxel for HER2-positive breast cancer (PHEDRA): a double-blind, randomized phase 3 trial. *BMC Med* **20**, (2022).
54. Goss, P. E. *et al.* Adjuvant lapatinib for women with early-stage HER2-positive breast cancer: a randomised, controlled, phase 3 trial. *Lancet Oncol* **14**, 88–96 (2013).
55. Piccart-Gebhart, M. *et al.* Adjuvant Lapatinib and Trastuzumab for Early Human Epidermal Growth Factor Receptor 2-Positive Breast Cancer: Results From the Randomized Phase III Adjuvant Lapatinib and/or Trastuzumab Treatment Optimization Trial. *Journal of Clinical Oncology* **34**, 1034 (2016).
56. Chan, A. *et al.* Final Efficacy Results of Neratinib in HER2-positive Hormone Receptor-positive Early-stage Breast Cancer From the Phase III ExteNET Trial. *Clin Breast Cancer* **21**, 80-91.e7 (2021).
57. Geyer, C. E., Forster, J. & Lindquist, D. Lapatinib plus capecitabine for HER2-positive advanced breast cancer. *Advances in Breast Cancer* **5**, 45 (2008).
58. Di Leo, A. *et al.* Phase III, double-blind, randomized study comparing lapatinib plus paclitaxel with placebo plus paclitaxel as first-line treatment for metastatic breast cancer. *J Clin Oncol* **26**, 5544–52 (2008).
59. Blackwell, K. L. *et al.* Overall survival benefit with lapatinib in combination with trastuzumab for patients with human epidermal growth factor receptor 2-positive metastatic breast cancer: Final results from the EGF104900 study. *Journal of Clinical Oncology* **30**, 2585–2592 (2012).
60. Johnston, S. *et al.* Lapatinib combined with letrozole versus letrozole and placebo as first-line therapy for postmenopausal hormone receptor - Positive metastatic breast cancer. *Journal of Clinical Oncology* **27**, 5538–5546 (2009).
61. Guan, Z. *et al.* Randomized trial of lapatinib versus placebo added to paclitaxel in the treatment of human epidermal growth factor receptor 2-overexpressing metastatic breast cancer. *J Clin Oncol* **31**, 1947–1953 (2013).
62. Gelmon, K. A. *et al.* Lapatinib or trastuzumab plus taxane therapy for human epidermal growth factor receptor 2-positive advanced breast cancer: Final results of NCIC CTG MA.31. *Journal of Clinical Oncology* **33**, 1574–1583 (2015).
63. Pivot, X. *et al.* CEREBEL (EGF111438): A phase III, randomized, open-label study of lapatinib plus capecitabine versus trastuzumab plus capecitabine in patients with human epidermal growth factor receptor 2-positive metastatic breast cancer. *Journal of Clinical Oncology* **33**, 1564–1573 (2015).
64. Johnston, S. R. D. *et al.* Phase III, randomized study of dual human epidermal growth factor receptor 2 (HER2) blockade with lapatinib plus trastuzumab in combination with an aromatase inhibitor in postmenopausal women with HER2-positive, hormone receptor–positive metastatic breast cancer: Updated results of alternative. *Journal of Clinical Oncology* **39**, 79–89 (2021).
65. Fehm, T. *et al.* HER2 status of circulating tumor cells in patients with metastatic breast cancer: A prospective, multicenter trial. *Breast Cancer Res Treat* **124**, 403–412 (2010).
66. Xu, B. H. *et al.* Lapatinib plus capecitabine in treating HER2-positive advanced breast cancer: efficacy, safety, and biomarker results from Chinese patients. *Chin J Cancer* **30**, 327 (2011).
67. Esteva, F. J. *et al.* An Open-Label Safety Study of Lapatinib Plus Trastuzumab Plus Paclitaxel in First-Line HER2-Positive Metastatic Breast Cancer. *Oncologist* **18**, 661 (2013).
68. Burstein, H. J. *et al.* Endocrine Therapy With or Without Inhibition of Epidermal Growth Factor Receptor and Human Epidermal Growth Factor Receptor 2: A Randomized, Double-Blind, Placebo-Controlled Phase III Trial of Fulvestrant With or Without Lapatinib for Postmenopausal Women With Hormone Receptor–Positive Advanced Breast Cancer—CALGB 40302 (Alliance). *Journal of Clinical Oncology* **32**, 3959 (2014).
69. Saura, C. *et al.* Neratinib plus capecitabine versus lapatinib plus capecitabine in HER2-positive metastatic breast cancer previously treated with  $\geq 2$  HER2-directed regimens: Phase III NALA trial. *Journal of Clinical Oncology* **38**, 3138–3149 (2020).
70. Xu, B. *et al.* Pyrotinib plus capecitabine versus lapatinib plus capecitabine for the treatment of HER2-positive metastatic breast cancer (PHOEBE): a multicentre, open-label, randomised, controlled, phase 3 trial. *Lancet Oncol* **22**, 351–360 (2021).
71. Yan, M. *et al.* Pyrotinib plus capecitabine for human epidermal factor receptor 2-positive metastatic breast cancer after trastuzumab and taxanes (PHENIX): a randomized, double-blind, placebo-controlled phase 3 study. *Translational Breast Cancer Research* **1**, 13–13 (2020).
72. von Minckwitz, G. *et al.* Survival after neoadjuvant chemotherapy with or without bevacizumab or everolimus for HER2-negative primary breast cancer (GBG 44-GeparQuinto). *Annals of Oncology* **25**, 2363–2372 (2014).
73. Bachelot, T. *et al.* Everolimus Added to Adjuvant Endocrine Therapy in Patients With High-Risk Hormone Receptor-Positive, Human Epidermal Growth Factor Receptor 2-Negative Primary Breast Cancer. *Journal of Clinical Oncology* **386**, (2022).

74. Guarneri, V. *et al.* Everolimus plus aromatase inhibitors as maintenance therapy after first-line chemotherapy: Final results of the phase III randomised MAIN-A (MAINtenance Afinitor) trial. *Eur J Cancer* **154**, 21–29 (2021).
75. Tesch, H. *et al.* Efficacy and safety of everolimus plus exemestane in postmenopausal women with hormone receptor-positive, human epidermal growth factor receptor 2-negative locally advanced or metastatic breast cancer: Results of the single-arm, phase IIIB 4EVER trial. *Int J Cancer* **144**, 877 (2019).
76. Im, Y. H. *et al.* Safety and efficacy of everolimus (EVE) plus exemestane (EXE) in postmenopausal women with locally advanced or metastatic breast cancer: final results from EVEREXES. *Breast Cancer Res Treat* **188**, 77–89 (2021).
77. Hurvitz, S. A. *et al.* Combination of everolimus with trastuzumab plus paclitaxel as first-line treatment for patients with HER2-positive advanced breast cancer (BOLERO-1): a phase 3, randomised, double-blind, multicentre trial. *Lancet Oncol* **16**, 816–829 (2015).
78. Yardley, D. A. *et al.* Everolimus Plus Exemestane in Postmenopausal Patients with HR+ Breast Cancer: BOLERO-2 Final Progression-Free Survival Analysis. *Adv Ther* **30**, 870 (2013).
79. André, F. *et al.* Everolimus for women with trastuzumab-resistant, HER2-positive, advanced breast cancer (BOLERO-3): a randomised, double-blind, placebo-controlled phase 3 trial. *Lancet Oncol* **15**, 580–591 (2014).
80. Jerusalem, G. *et al.* Safety of everolimus plus exemestane in patients with hormone-receptor-positive, HER2-negative locally advanced or metastatic breast cancer progressing on prior non-steroidal aromatase inhibitors: primary results of a phase IIIB, open-label, single-arm, expanded-access multicenter trial (BALLET). *Annals of Oncology* **27**, 1719–1725 (2016).
81. Moore, H. C. F. *et al.* A randomized trial of fulvestrant, everolimus and anastrozole in the front-line treatment of advanced hormone receptor-positive breast cancer, SWOG S1222. *Clin Cancer Res* **28**, 611 (2022).
82. Willemsen, A. E. C. A. B. *et al.* Everolimus Exposure and Early Metabolic Response as Predictors of Treatment Outcomes in Breast Cancer Patients Treated with Everolimus and Exemestane. *Target Oncol* **13**, 641–648 (2018).
83. Decker, T. *et al.* Final results from IMPROVE: a randomized, controlled, open-label, two-arm, cross-over phase IV study to determine patients' preference for everolimus in combination with exemestane or capecitabine in combination with bevacizumab in advanced HR-positive, HER2-negative breast cancer. *BMC Cancer* **20**, (2020).
84. Wolff, A. C. *et al.* Randomized Phase III Placebo-Controlled Trial of Letrozole Plus Oral Temozolomide As First-Line Endocrine Therapy in Postmenopausal Women With Locally Advanced or Metastatic Breast Cancer. *Journal of Clinical Oncology* **31**, 195 (2013).
85. André, F. *et al.* Alpelisib for PIK3CA -Mutated, Hormone Receptor-Positive Advanced Breast Cancer. *New England Journal of Medicine* **380**, 1929–1940 (2019).
86. Baselga, J. *et al.* Buparlisib plus fulvestrant versus placebo plus fulvestrant in postmenopausal, hormone receptor-positive, HER2-negative, advanced breast cancer (BELLE-2): a randomised, double-blind, placebo-controlled, phase 3 trial. *Lancet Oncol* **18**, 904 (2017).
87. Di Leo, A. *et al.* Buparlisib plus fulvestrant in postmenopausal women with hormone-receptor-positive, HER2-negative, advanced breast cancer progressing on or after mTOR inhibition (BELLE-3): a randomised, double-blind, placebo-controlled, phase 3 trial. *Lancet Oncol* **19**, 87–100 (2018).
88. Martín, M. *et al.* A randomized adaptive phase II/III study of buparlisib, a pan-class I PI3K inhibitor, combined with paclitaxel for the treatment of HER2- advanced breast cancer (BELLE-4). *Annals of Oncology* **28**, 313–320 (2017).
89. Turner, N. *et al.* Ipatasertib plus paclitaxel for PIK3CA/AKT1/PTEN-altered hormone receptor-positive HER2-negative advanced breast cancer: primary results from cohort B of the IPATunity130 randomized phase 3 trial. *Breast Cancer Res Treat* **191**, 565 (2022).
90. Dent, S. *et al.* Phase III randomized study of taselisib or placebo with fulvestrant in estrogen receptor-positive, PIK3CA-mutant, HER2-negative, advanced breast cancer: the SANDPIPER trial. *Ann Oncol* **32**, 197 (2021).
91. Turner, N. C. *et al.* Capivasertib in Hormone Receptor-Positive Advanced Breast Cancer. *New England Journal of Medicine* **388**, 2058–2070 (2023).
92. Jiang, Z. *et al.* Tucidinostat plus exemestane for postmenopausal patients with advanced, hormone receptor-positive breast cancer (ACE): a randomised, double-blind, placebo-controlled, phase 3 trial. *Lancet Oncol* **20**, 806–815 (2019).
93. Rugo, H. S. *et al.* Margetuximab Versus Trastuzumab in Patients With Previously Treated HER2-Positive Advanced Breast Cancer (SOPHIA): Final Overall Survival Results From a Randomized Phase 3 Trial. *Journal of Clinical Oncology* **41**, 198 (2023).
